# Supplementary material for: Fluorinated microgel star polymers as fluorous nanocapsules for the encapsulation and release of perfluorinated compounds
Source: Royal Society of Chemistry journal article supplement (doi:10.1039/c5py00113g), 2015-01-01
Supplement: c5py00113g1.pdf [file c5py00113g1.pdf]

## Supporting Information

### Fluorinated Microgel Star Polymers as Fluorous Nanocapsules for the Encapsulation and Release of Perfluorinated Compounds

Yuta Koda, Takaya Terashima,<sup>\*</sup> Mitsuo Sawamoto<sup>\*</sup>

<sup>\*</sup>Corresponding Author

Polymer Chemistry, Graduate School of Engineering, Kyoto University,

Katsura, Nishikyo-ku, Kyoto 615-8510, Japan

Tel: +81-75-383-2600, Fax: +81-75-383-2601

E-mail: terashima@living.polym.kyoto-u.ac.jp, sawamoto@star.polym.kyoto-u.ac.jp

#### Contents

**Figure S1.** Time-conversion curves

S2

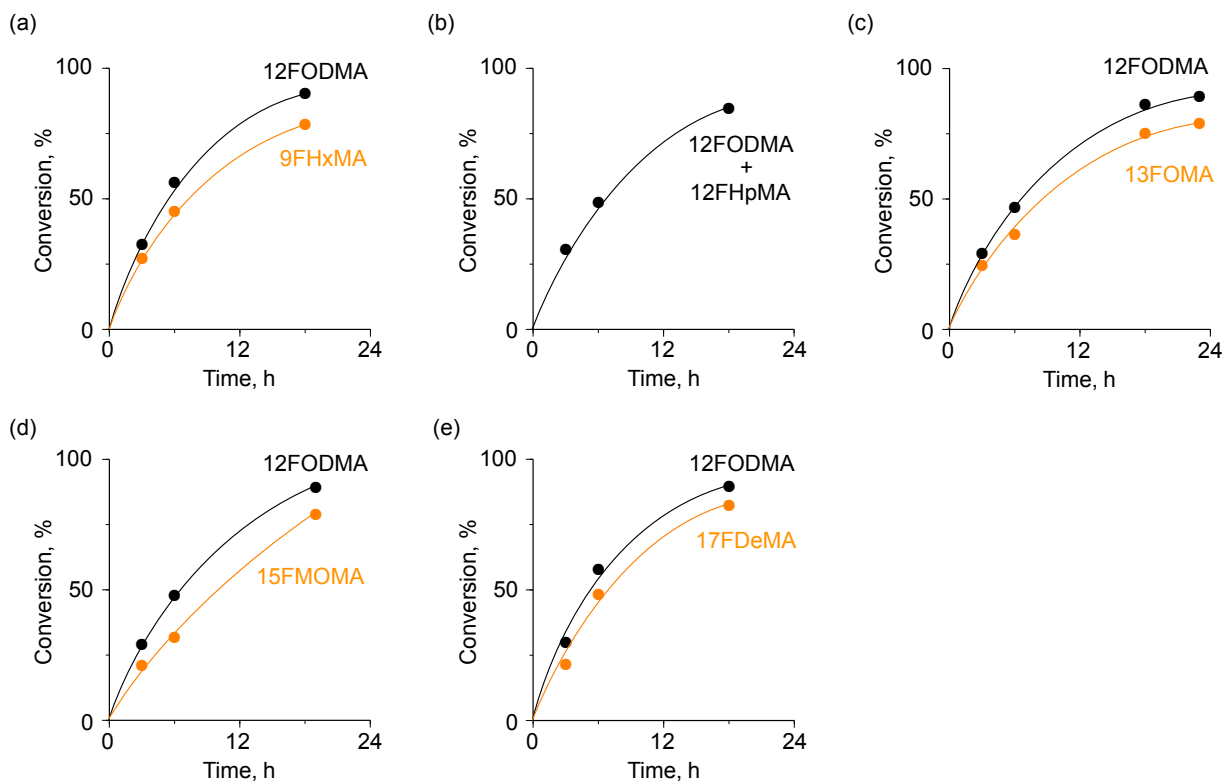

**Figure S1.** Time-conversion curves in the linking reaction of PMMA-Cl arms with 12FODMA (1) and  $R_f$ MA (a: 9FHxMA b: 12FHpMA c: 13FOMA, d: 15FMOMA, e: 17FDeMA) for (a) S1, (b) S2, (c) S3, (d) S4, and (e) S5.
